# Supplementary material
Source: MDPI journal article supplement (https://www.mdpi.com/2673-6756/3/4/44)
Supplement: s1 [file s1]

## Supplementary material

Table S1. Cohen's Kappa Analysis, Observer 1 vs. Observer 2, Binary Scale.

|                  | lower | estimate | upper |
|------------------|-------|----------|-------|
| unweighted kappa | 1     | 1        | 1     |
| weighted kappa   | 1     | 1        | 1     |

Table S2. Cohen's Kappa Analysis, Observer 1 vs. Observer 2, 5-levels Scale.

|                  | lower     | estimate  | upper     |
|------------------|-----------|-----------|-----------|
| unweighted kappa | 0.9312759 | 0.9495804 | 0.9678849 |
| weighted kappa   | 0.9735021 | 0.9807306 | 0.9879591 |

Table S3. Cohen's Kappa Analysis, Observer 1, Replica 1 vs. Replica 2, Binary Scale.

|                  | lower | estimate | upper |
|------------------|-------|----------|-------|
| unweighted kappa | 1     | 1        | 1     |
| weighted kappa   | 1     | 1        | 1     |

Table S4. Cohen's Kappa Analysis, Observer 1, Replica 1 vs. Replica 2, 5-levels Scale.

|                  | lower     | estimate  | upper |
|------------------|-----------|-----------|-------|
| unweighted kappa | 0.9840145 | 0.9945901 | 1     |
| weighted kappa   | 0.9938687 | 0.9979296 | 1     |

Table S5. Cohen's Kappa Analysis, Observer 1, Replica 1 vs. Replica 3, Binary Scale.

|                  | lower | estimate | upper |
|------------------|-------|----------|-------|
| unweighted kappa | 1     | 1        | 1     |
| weighted kappa   | 1     | 1        | 1     |

Table S6. Cohen's Kappa Analysis, Observer 1, Replica 1 vs. Replica 3, 5-levels Scale.

|                  | lower     | estimate  | upper |
|------------------|-----------|-----------|-------|
| unweighted kappa | 0.9840145 | 0.9945901 | 1     |
| weighted kappa   | 0.9938687 | 0.9979296 | 1     |

Table S7. Cohen's Kappa Analysis, Observer 1, Replica 2 vs Replica 3, Binary Scale.

|                  | lower | estimate | upper |
|------------------|-------|----------|-------|
| unweighted kappa | 1     | 1        | 1     |
| weighted kappa   | 1     | 1        | 1     |

Table S8. Cohen's Kappa Analysis, Observer 1, Replica 2 vs. Replica 3, 5-levels Scale.

|                  | lower | estimate | upper |
|------------------|-------|----------|-------|
| unweighted kappa | 1     | 1        | 1     |
| weighted kappa   | 1     | 1        | 1     |

Table S9. Cohen's Kappa Analysis, Observer 2, Replica 1 vs. Replica 2, Binary Scale.

|                  | lower | estimate | upper |
|------------------|-------|----------|-------|
| unweighted kappa | 1     | 1        | 1     |
| weighted kappa   | 1     | 1        | 1     |

Table S10. Cohen's Kappa Analysis, Observer 2, Replica 1 vs. Replica 2, 5-levels Scale.

|                  | lower     | estimate  | upper |
|------------------|-----------|-----------|-------|
| unweighted kappa | 0.9656066 | 0.9838272 | 1     |
| weighted kappa   | 0.9867908 | 0.9938370 | 1     |

Table S11. Cohen's Kappa Analysis, Observer 2, Replica 1 vs. Replica 3, Binary Scale.

|                  | lower | estimate | upper |
|------------------|-------|----------|-------|
| unweighted kappa | 1     | 1        | 1     |
| weighted kappa   | 1     | 1        | 1     |

Table S12. Cohen's Kappa Analysis, Observer 2, Replica 1 vs. Replica 3, 5-levels Scale.

|                  | lower     | estimate  | upper |
|------------------|-----------|-----------|-------|
| unweighted kappa | 0.9656066 | 0.9838272 | 1     |
| weighted kappa   | 0.9867908 | 0.9938370 | 1     |

Table S13. Cohen's Kappa Analysis, Observer 2, Replica 2 vs Replica 3, Binary Scale.

|                  | lower | estimate | upper |
|------------------|-------|----------|-------|
| unweighted kappa | 1     | 1        | 1     |
| weighted kappa   | 1     | 1        | 1     |

Table S14. Cohen's Kappa Analysis, Observer 2, Replica 2 vs Replica 3, 5-levels Scale.

|                  | lower | estimate | upper |
|------------------|-------|----------|-------|
| unweighted kappa | 1     | 1        | 1     |
| weighted kappa   | 1     | 1        | 1     |
